# Supplementary material
Source: PubMed Central journal article supplement (PMC7244338)
Supplement: EMS83227-supplement-1.pdf [file EMS83227-supplement-1.pdf]

## Supplementary Information of

# Epidemic of carbapenem-resistant *Klebsiella pneumoniae* in Europe is driven by nosocomial spread

Sophia David<sup>1</sup>, Sandra Reuter<sup>2</sup>, Simon R. Harris<sup>3</sup>, Corinna Glasner<sup>4</sup>, Theresa Feltwell<sup>3</sup>, Silvia Argimon<sup>1</sup>, Khalil Abudahab<sup>1</sup>, Richard Goater<sup>1</sup>, Tommaso Giani<sup>5</sup>, Giulia Errico<sup>6</sup>, Marianne Aspbury<sup>7</sup>, Sara Sjunnebo<sup>8</sup>, the European Survey of Carbapenemase-Producing Enterobacteriaceae (EuSCAPE) Working Group<sup>9</sup>, the ESCMID Study Group for Epidemiological Markers (ESGEM)<sup>10</sup>, Edward J. Feil<sup>11</sup>, Gian Maria Rossolini<sup>5,12</sup>, David M. Aanensen<sup>1,13\*</sup> & Hajo Grundmann<sup>2,4\*</sup>

## Supplementary Figures

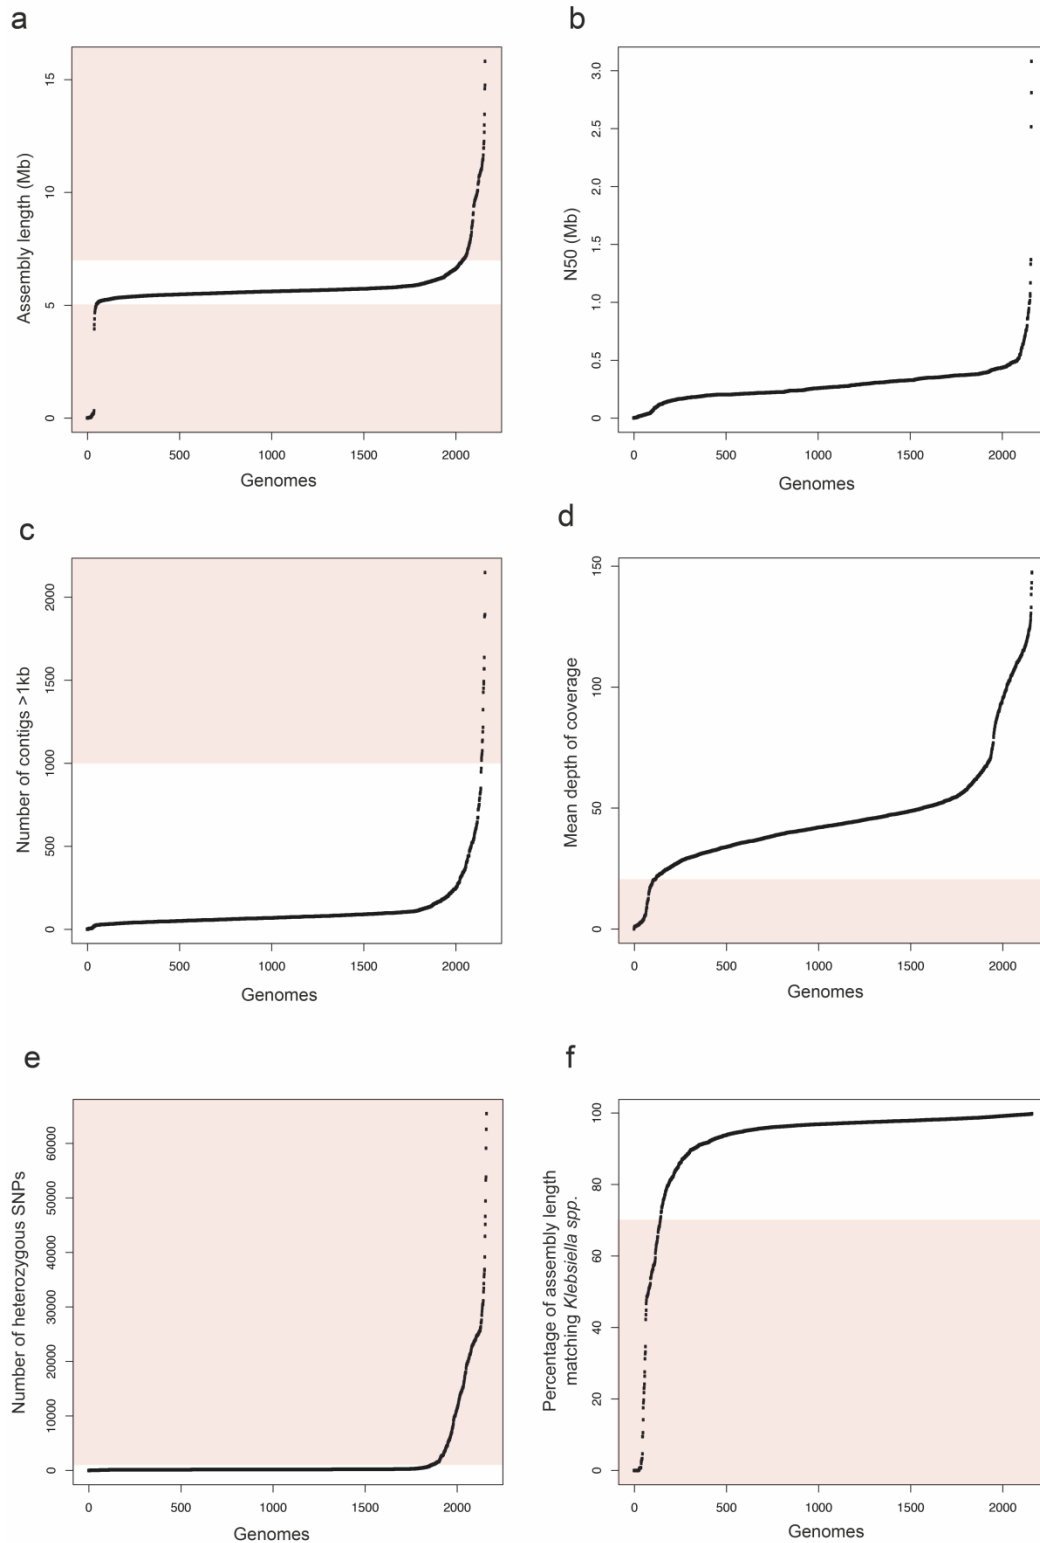

**Supplementary Figure 1. Quality control (QC) data for all 2162 sequenced isolates submitted as *K. pneumoniae*.** Plots show the assembly length (a), N50 values of the assemblies (b), the number of contigs per assembly over 1kb (c), the mean depth of coverage (d), the number of

heterozygous SNPs called by mapping reads to a reference (e), and the percentage of the assembly length matching *Klebsiella spp.* using MASH (f).

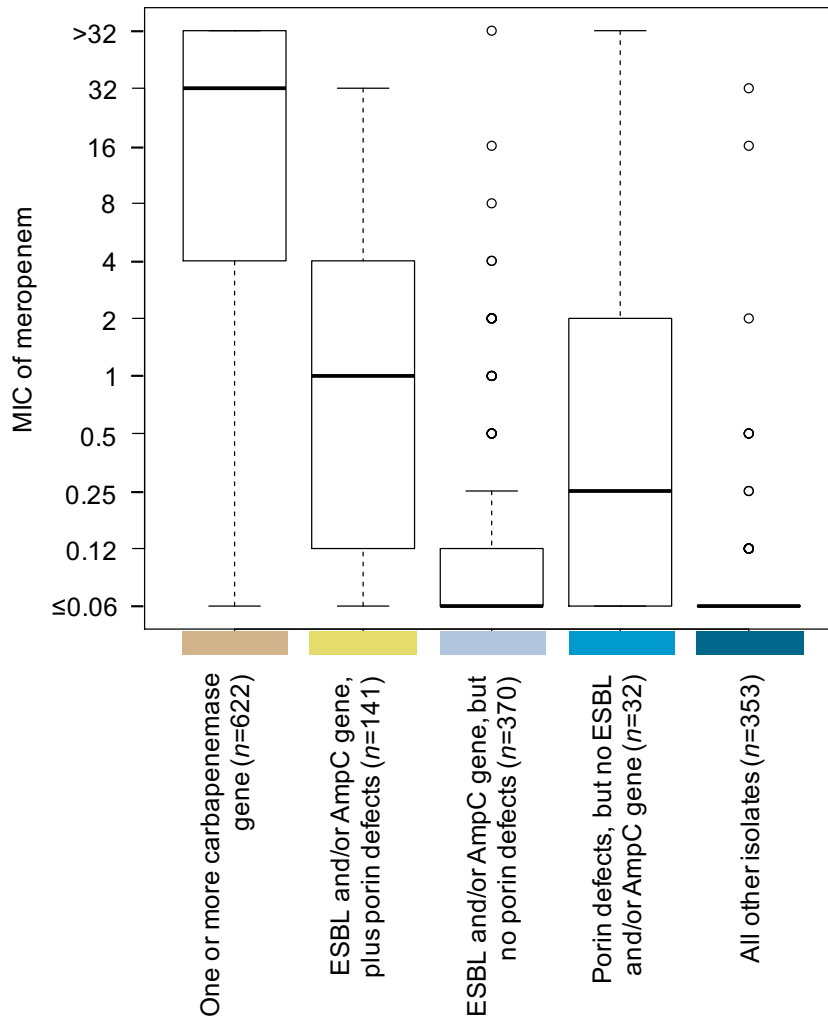

**Supplementary Figure 2. Boxplots show minimum inhibitory concentration (MIC) values for meropenem obtained by centralised re-testing of 1518/1649 *K. pneumoniae sensu stricto* isolates that are divided according to the beta-lactam resistome groupings.** The y-axis values are treated as if they increment equally. The boxes represent the interquartile range of values in each category and the bold line within each box shows the median value. Whiskers show the upper and lower values that are still within 1.5x the value of the interquartile range above and below the third and first quartiles, respectively. Outliers, represented by small circles, are values outside of these ranges. The boxplots from left to right represent 622, 141, 370, 32 and 353 values.

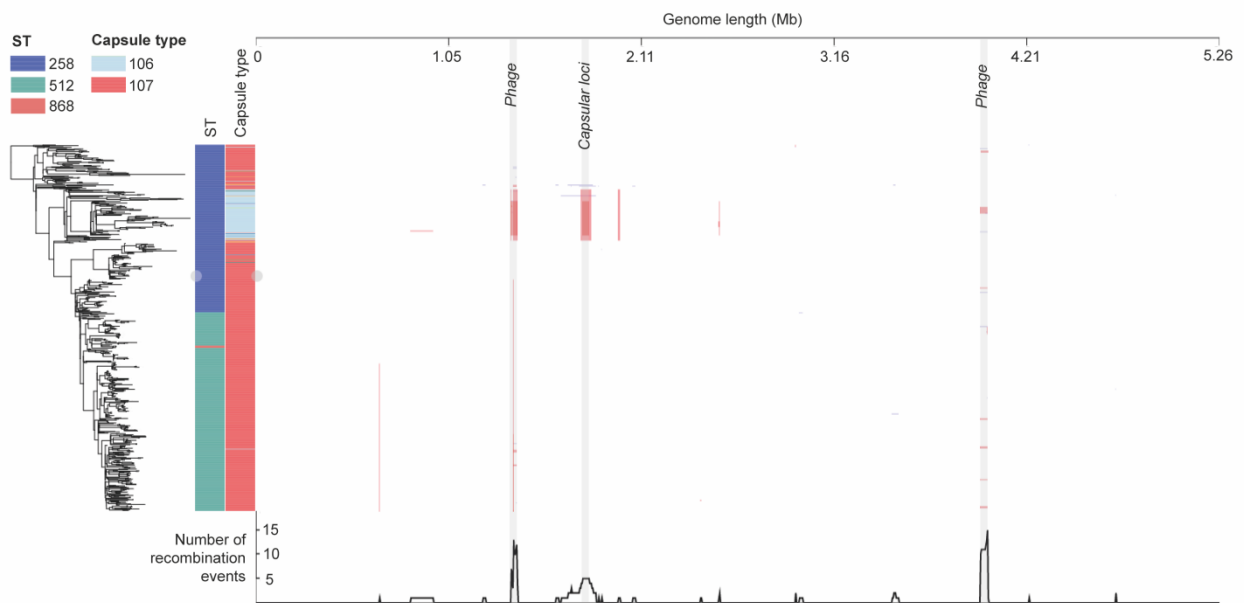

**Supplementary Figure 3. Recombination events in the ST258/512 lineage.** Phylogenetic tree of 651 isolates belonging to ST258, ST512 and ST868, and the predicted recombined regions, as visualised in Phandango. Genomic regions predicted to have been involved in at least five recombination events are highlighted. Only isolates with a capsule (K-) type of 106 or 107 (which constitute the majority) are labelled in the key.

## Supplementary Tables

Supplementary Tables 2, 3, 4 and 6 are provided separately due to their large size.

**Supplementary Table 1. Summary of the quality control (QC) results for all sequenced isolates submitted as *K. pneumoniae*.**

| <b>Criteria</b>                                                                    | <b>No. (and %) of <i>K. pneumoniae</i> passed from total of 2162</b> |
|------------------------------------------------------------------------------------|----------------------------------------------------------------------|
| Assembly length (5-7Mb)                                                            | 2045 (94.6%)                                                         |
| No. of SPAdes contigs (>1000bp) < 1000                                             | 2141 (99.0%)                                                         |
| 90% assembly length in contigs > 1000bp                                            | 2095 (96.9%)                                                         |
| Correct species match using MASH (raw reads)                                       | 2099 (97.1%)                                                         |
| Correct species match using MASH (SPAdes assembly)                                 | 2062 (95.4%)                                                         |
| Correct species match using MASH (individual SPAdes contigs)                       | 2106 (97.4%)                                                         |
| Percentage length of individual SPAdes contigs with top match to correct taxa > 70 | 2020 (93.4%)                                                         |
| No. of heterozygous SNPS < 1000                                                    | 1863 (86.2%)                                                         |
| Mean depth of coverage > 20x                                                       | 2058 (95.2%)                                                         |
| <b>All criteria fulfilled</b>                                                      | <b>1717 (79.4%)</b>                                                  |

**Supplementary Table 5. Concordance between the PCR results obtained by the national expert laboratories (NELs) and *in silico* results from the genome sequencing data for each of the four major carbapenemase genes (*bla*<sub>KPC-like</sub>, *bla*<sub>NDM-like</sub>, *bla*<sub>VIM-like</sub> and *bla*<sub>OXA-48-like</sub>). Results are shown for the 944 isolates submitted as carbapenem-non-susceptible only (PCR was not performed on isolates submitted as susceptible). False positive and negative results are calculated for the PCR results with the *in silico* results being the reference.**

| <b>Carbapenemase gene</b>                                           | <b><i>bla</i><sub>KPC-like</sub></b> | <b><i>bla</i><sub>NDM-like</sub></b> | <b><i>bla</i><sub>VIM-like</sub></b> | <b><i>bla</i><sub>OXA-48-like</sub></b> |
|---------------------------------------------------------------------|--------------------------------------|--------------------------------------|--------------------------------------|-----------------------------------------|
| <b>No. isolates positive <i>in silico</i></b>                       | 305                                  | 76                                   | 53                                   | 238                                     |
| <b>No. isolates negative <i>in silico</i></b>                       | 639                                  | 868                                  | 891                                  | 706                                     |
| <b>No. isolates positive <i>in silico</i> but negative with PCR</b> | 5                                    | 5                                    | 2                                    | 8                                       |
| <b>No. isolates negative <i>in silico</i> but positive with PCR</b> | 6                                    | 9                                    | 7                                    | 8                                       |
| <b>False negative rate (%)</b>                                      | 1.64                                 | 6.58                                 | 3.77                                 | 3.36                                    |
| <b>False positive rate (%)</b>                                      | 0.94                                 | 1.04                                 | 0.79                                 | 1.13                                    |
| <b>Total no. (and %) of concordant isolates</b>                     | 933 (98.8%)                          | 930 (98.5%)                          | 935 (99.0%)                          | 928 (98.3%)                             |

**Supplementary Table 7. URLs to phylogenetic analysis and corresponding metadata of isolates submitted by each of the participating countries, available using Microreact.** Data for countries that contributed a minimum of 5 isolates to the collection analysed here are included.

| <b>Country</b> | <b>URL</b>                                                                                                              |
|----------------|-------------------------------------------------------------------------------------------------------------------------|
| Austria        | <a href="https://microreact.org/project/EuSCAPE_Austria">https://microreact.org/project/EuSCAPE_Austria</a>             |
| Belgium        | <a href="https://microreact.org/project/EuSCAPE_Belgium">https://microreact.org/project/EuSCAPE_Belgium</a>             |
| Croatia        | <a href="https://microreact.org/project/EuSCAPE_Croatia">https://microreact.org/project/EuSCAPE_Croatia</a>             |
| Czech Republic | <a href="https://microreact.org/project/EuSCAPE_CzechRepublic">https://microreact.org/project/EuSCAPE_CzechRepublic</a> |
| Denmark        | <a href="https://microreact.org/project/EuSCAPE_Denmark">https://microreact.org/project/EuSCAPE_Denmark</a>             |
| Estonia        | <a href="https://microreact.org/project/EuSCAPE_Estonia">https://microreact.org/project/EuSCAPE_Estonia</a>             |
| France         | <a href="https://microreact.org/project/EuSCAPE_France">https://microreact.org/project/EuSCAPE_France</a>               |
| Germany        | <a href="https://microreact.org/project/EuSCAPE_Germany">https://microreact.org/project/EuSCAPE_Germany</a>             |
| Greece         | <a href="https://microreact.org/project/EuSCAPE_Greece">https://microreact.org/project/EuSCAPE_Greece</a>               |
| Hungary        | <a href="https://microreact.org/project/EuSCAPE_Hungary">https://microreact.org/project/EuSCAPE_Hungary</a>             |
| Ireland        | <a href="https://microreact.org/project/EuSCAPE_Ireland">https://microreact.org/project/EuSCAPE_Ireland</a>             |
| Israel         | <a href="https://microreact.org/project/EuSCAPE_Israel">https://microreact.org/project/EuSCAPE_Israel</a>               |
| Italy          | <a href="https://microreact.org/project/EuSCAPE_Italy">https://microreact.org/project/EuSCAPE_Italy</a>                 |
| Lithuania      | <a href="https://microreact.org/project/EuSCAPE_Lithuania">https://microreact.org/project/EuSCAPE_Lithuania</a>         |
| Luxembourg     | <a href="https://microreact.org/project/EuSCAPE_Luxembourg">https://microreact.org/project/EuSCAPE_Luxembourg</a>       |
| Malta          | <a href="https://microreact.org/project/EuSCAPE_Malta">https://microreact.org/project/EuSCAPE_Malta</a>                 |
| Montenegro     | <a href="https://microreact.org/project/EuSCAPE_Montenegro">https://microreact.org/project/EuSCAPE_Montenegro</a>       |
| Norway         | <a href="https://microreact.org/project/EuSCAPE_Norway">https://microreact.org/project/EuSCAPE_Norway</a>               |
| Poland         | <a href="https://microreact.org/project/EuSCAPE_Poland">https://microreact.org/project/EuSCAPE_Poland</a>               |
| Portugal       | <a href="https://microreact.org/project/EuSCAPE_Portugal">https://microreact.org/project/EuSCAPE_Portugal</a>           |
| Romania        | <a href="https://microreact.org/project/EuSCAPE_Romania">https://microreact.org/project/EuSCAPE_Romania</a>             |
| Serbia         | <a href="https://microreact.org/project/EuSCAPE_Serbia">https://microreact.org/project/EuSCAPE_Serbia</a>               |
| Slovakia       | <a href="https://microreact.org/project/EuSCAPE_Slovakia">https://microreact.org/project/EuSCAPE_Slovakia</a>           |
| Slovenia       | <a href="https://microreact.org/project/EuSCAPE_Slovenia">https://microreact.org/project/EuSCAPE_Slovenia</a>           |
| Spain          | <a href="https://microreact.org/project/EuSCAPE_Spain">https://microreact.org/project/EuSCAPE_Spain</a>                 |
| Turkey         | <a href="https://microreact.org/project/EuSCAPE_Turkey">https://microreact.org/project/EuSCAPE_Turkey</a>               |
| United Kingdom | <a href="https://microreact.org/project/EuSCAPE_UK">https://microreact.org/project/EuSCAPE_UK</a>                       |

## Supplementary Note

The following are additional authors from the ESCMID Study Group for Epidemiological Markers (ESGEM):

Guido Werner<sup>1</sup>, Frederic Laurent<sup>2</sup>, Joao Carrico<sup>3</sup>, Ed Feil<sup>4</sup>, Ana Budimir<sup>5</sup>, Hajo Grundmann<sup>6</sup>

<sup>1</sup>Department of Infectious Diseases, Robert Koch Institut Wernigerode, Wernigerode, Germany, <sup>2</sup>Institut for Infectious Agents, CHU de Lyon - Hôpital de la Croix-Rousse, Lyon, France, <sup>3</sup>Molecular Microbiology and Infection Unit, Universidade de Lisboa, Lisbon, Portugal, <sup>4</sup>Milner Centre for Evolution, University of Bath, Bath, UK, <sup>5</sup>Department of Clinical and Molecular Microbiology, University Hospital Centre Zagreb, Zagreb, Croatia, <sup>6</sup>Institute for Infection Prevention and Hospital Epidemiology, Medical Center – University of Freiburg, Freiburg, Germany
